# Supplementary material for: Combined metformin and simvastatin therapy inhibits SREBP2 maturation and alters energy metabolism in glioma
Source: PubMed Central journal article supplement (PMC11550444; doi:10.1038/s41419-024-07169-5), 2024-11-09

Fig.2c

Fig.2d

SREBP2-P

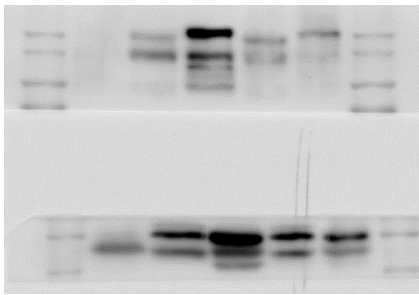

SREBP2-P

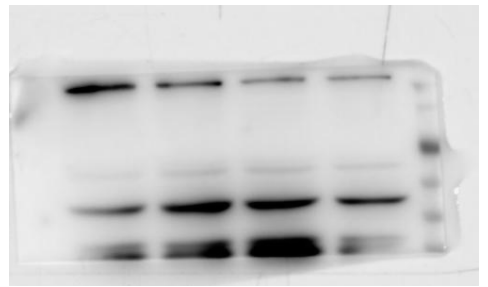

SREBP2-N

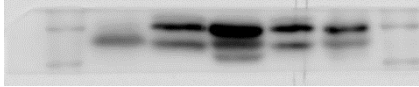

SREBP2-N

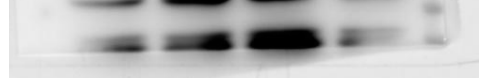

GLUT1

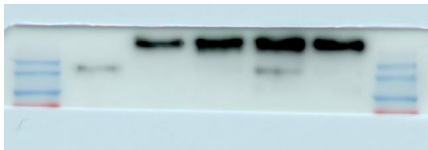

GLUT1

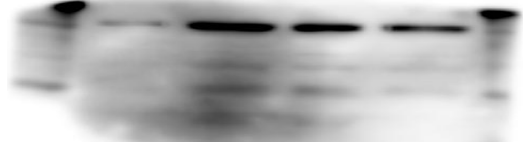

GLUT6

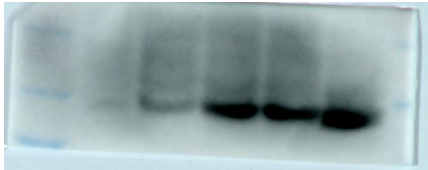

GLUT6

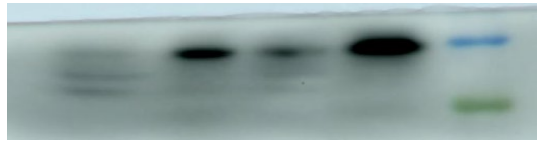

ACTB

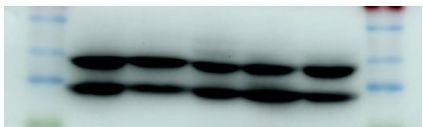

ACTB

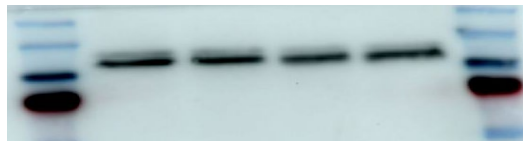

Fig.3a

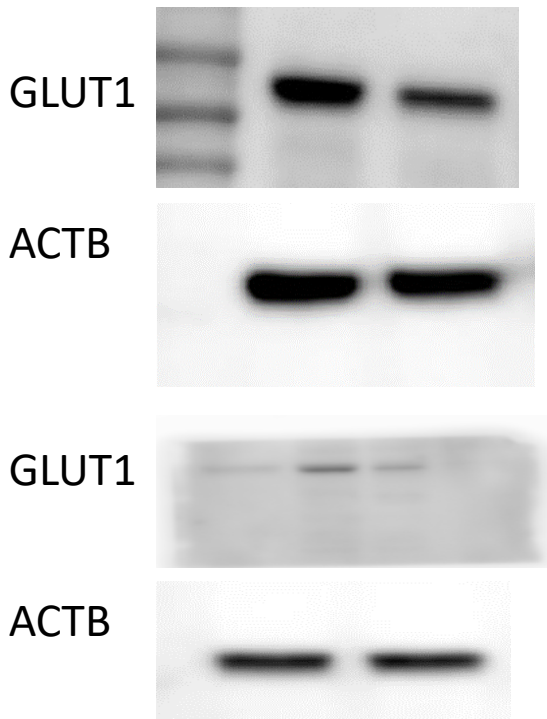

Fig.3b

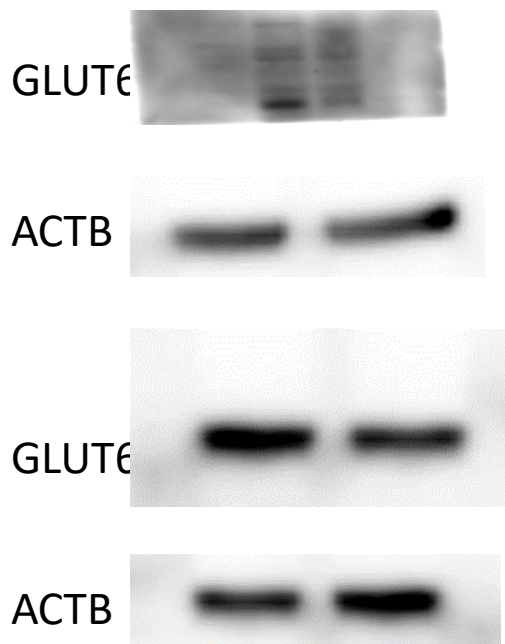

Fig.4F

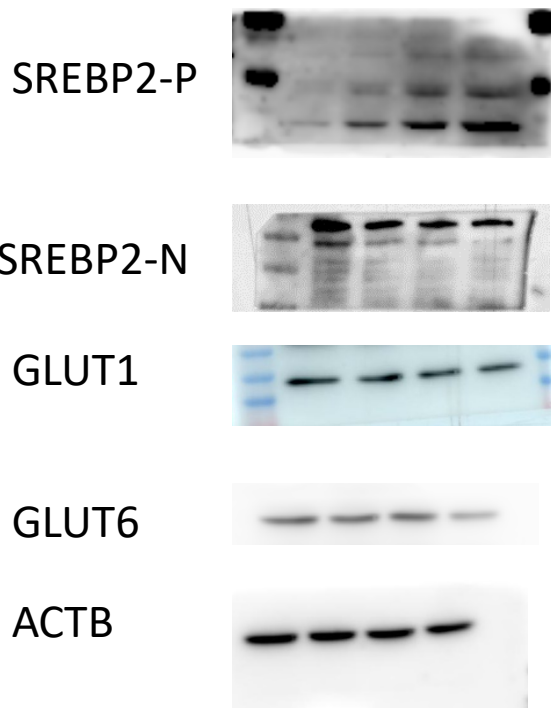

Fig.4H

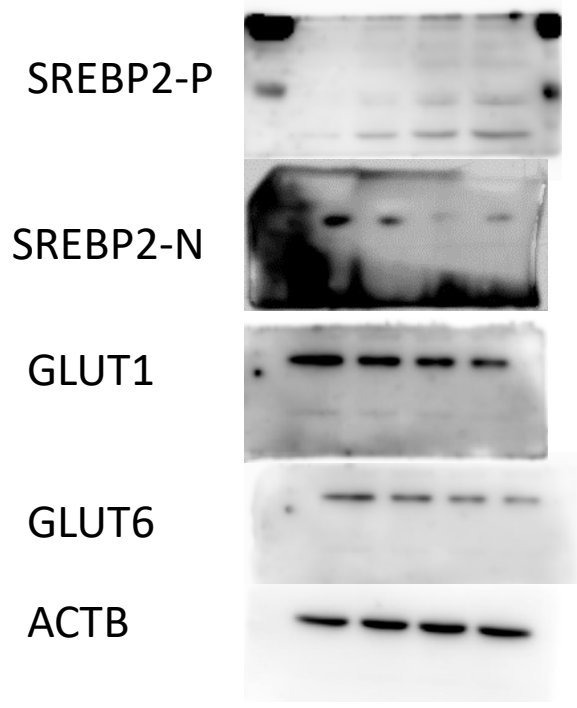

Fig.4J

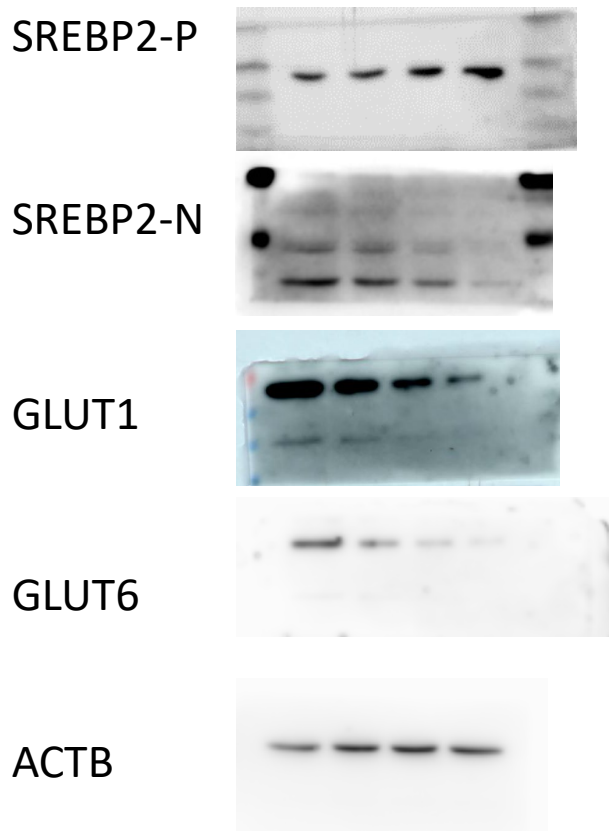

Fig.5C

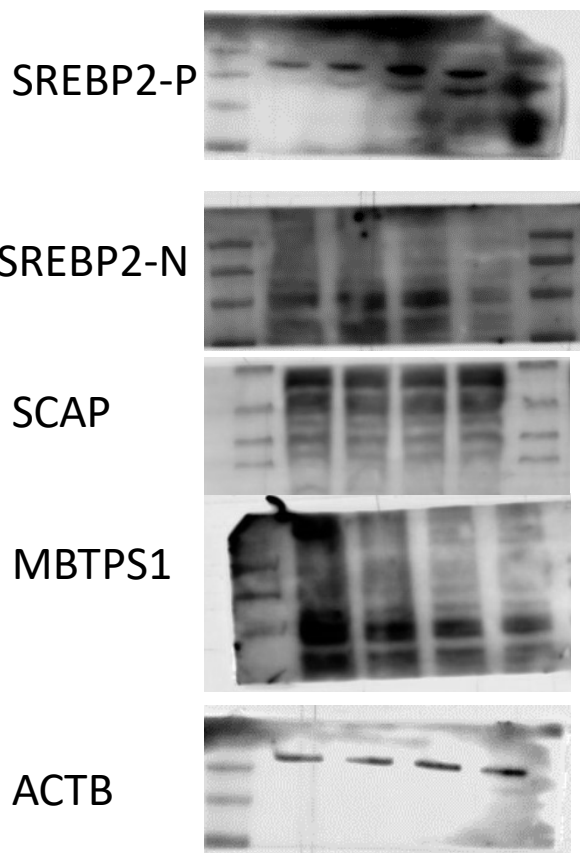

Fig.5C

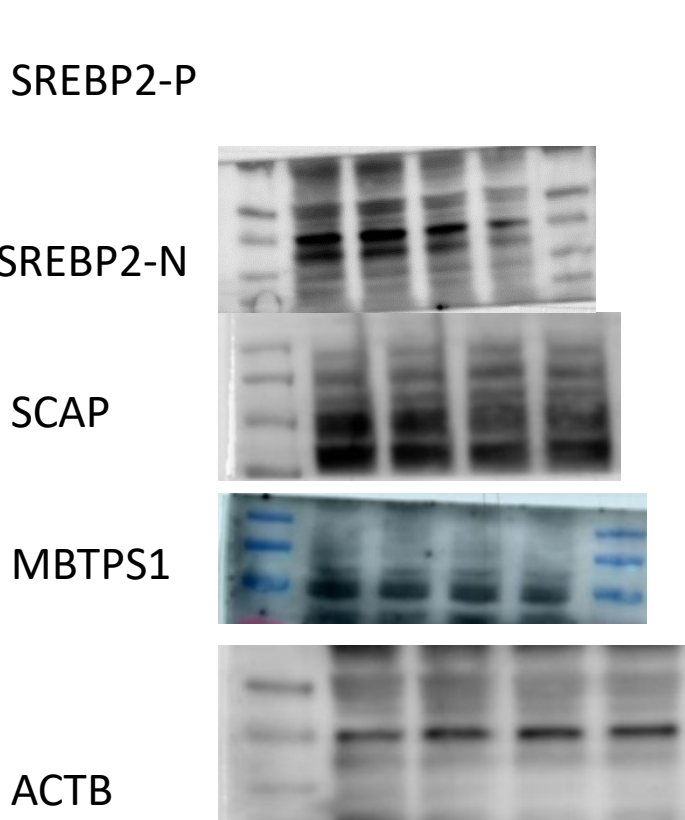

Fig.5C

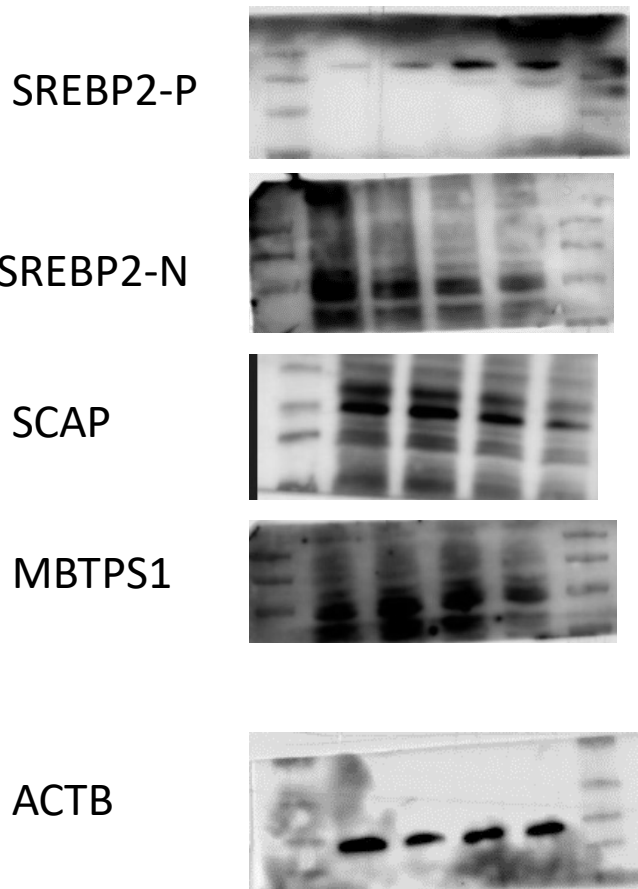

Fig.5C

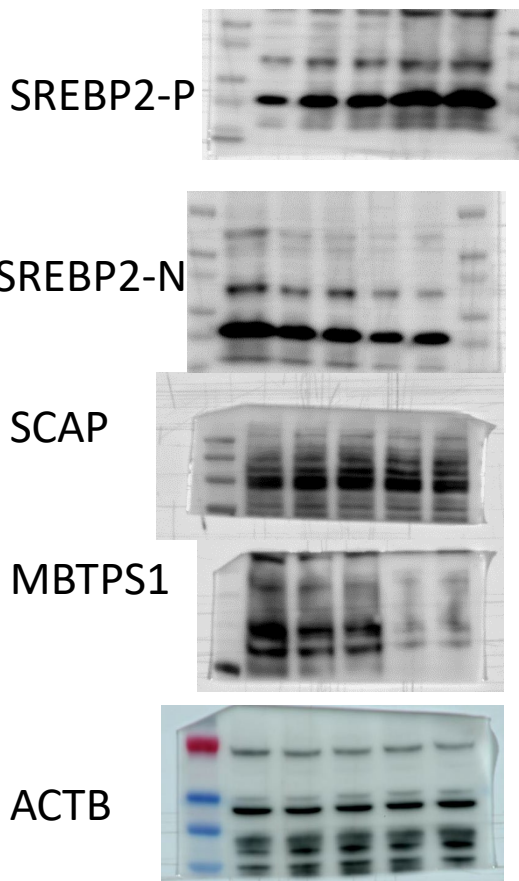

Fig.5C

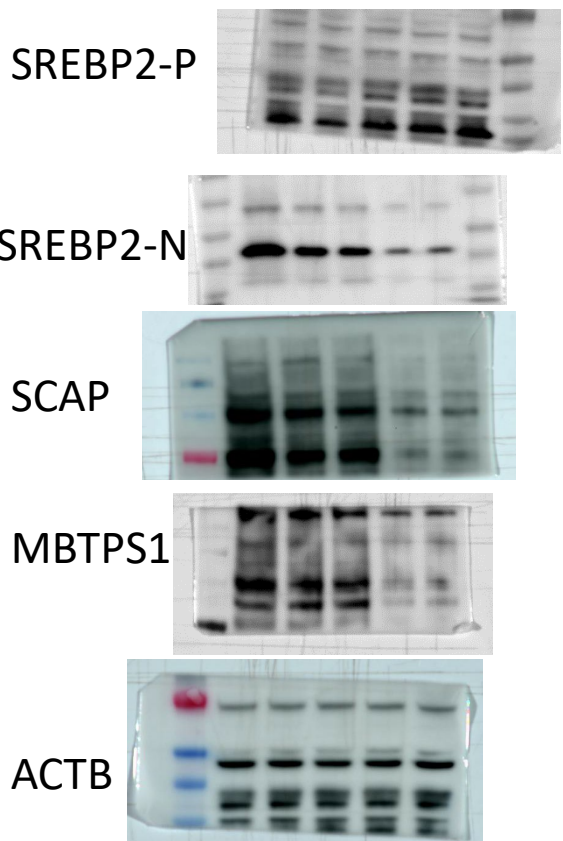

Fig.5C

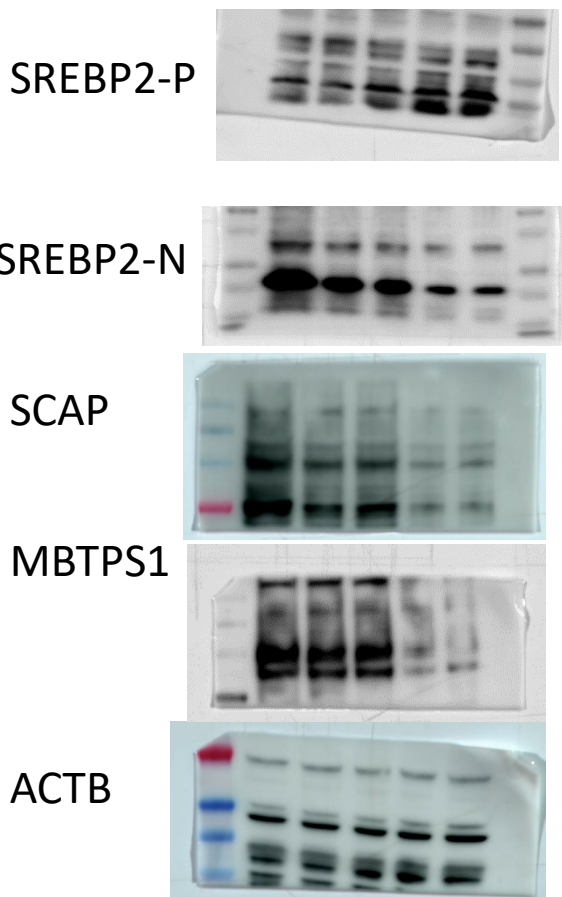

Fig.5D

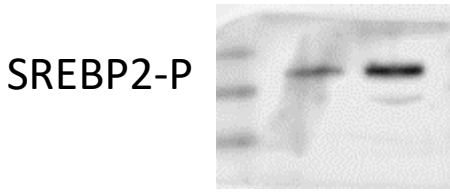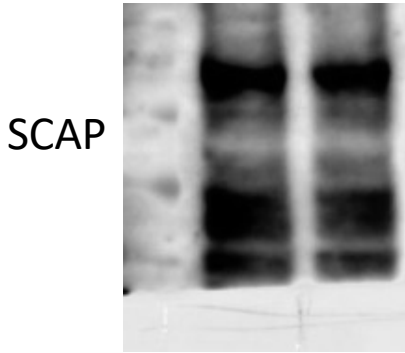

ACTB

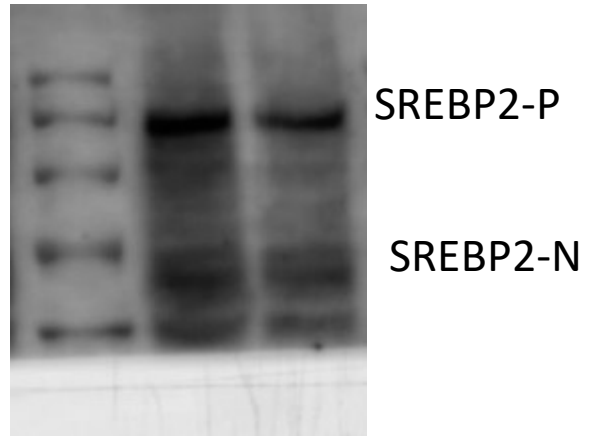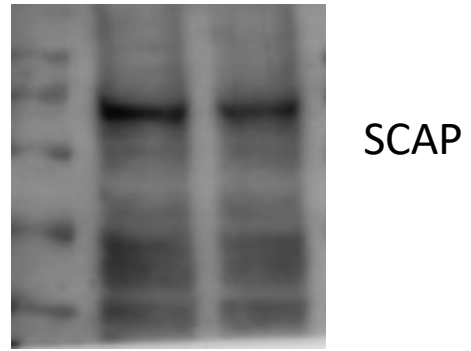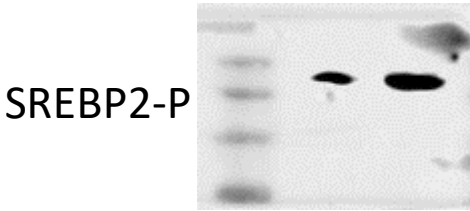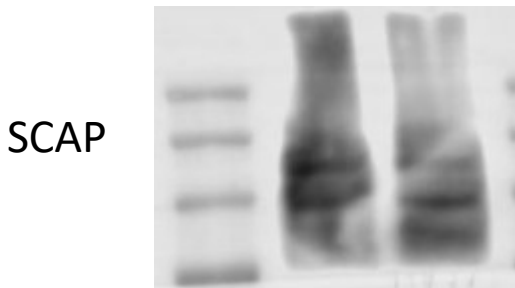

ACTB

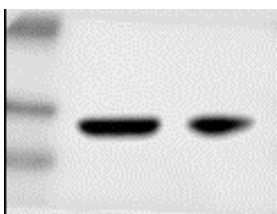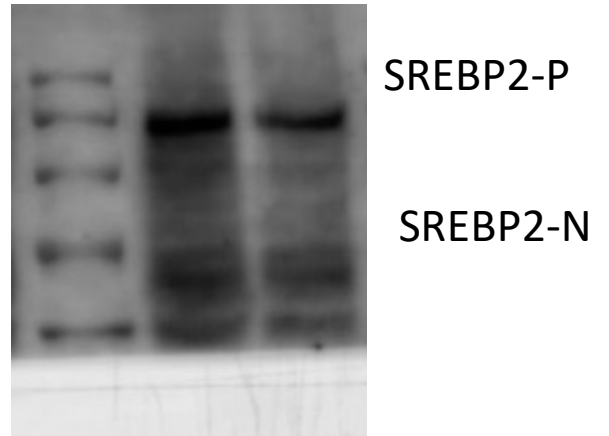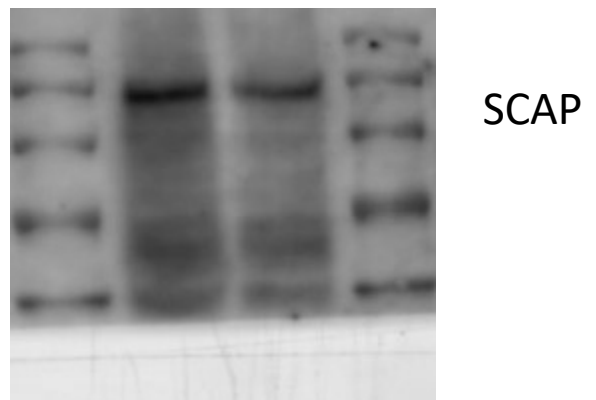

Fig.5D

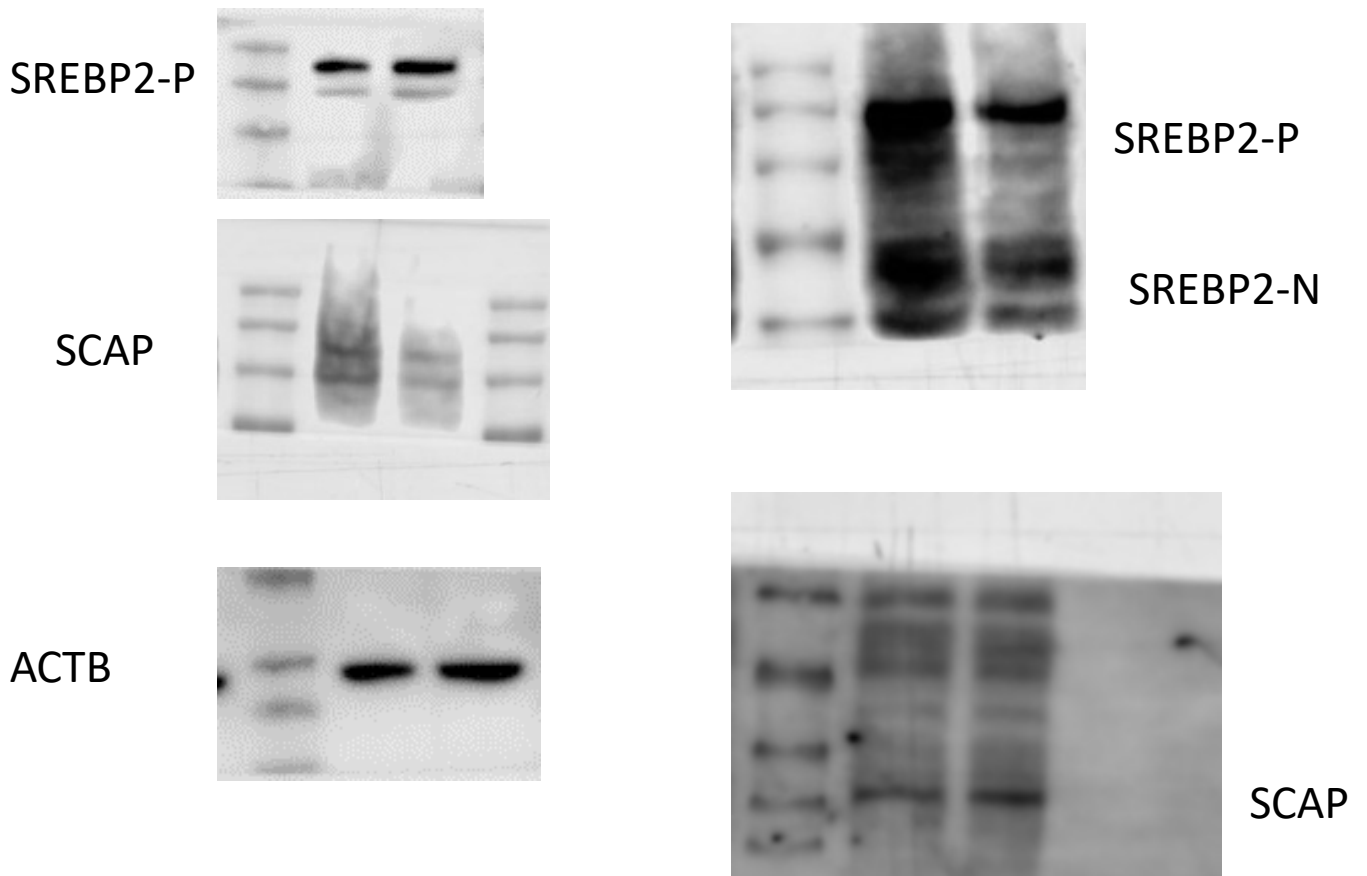

Fig.7e

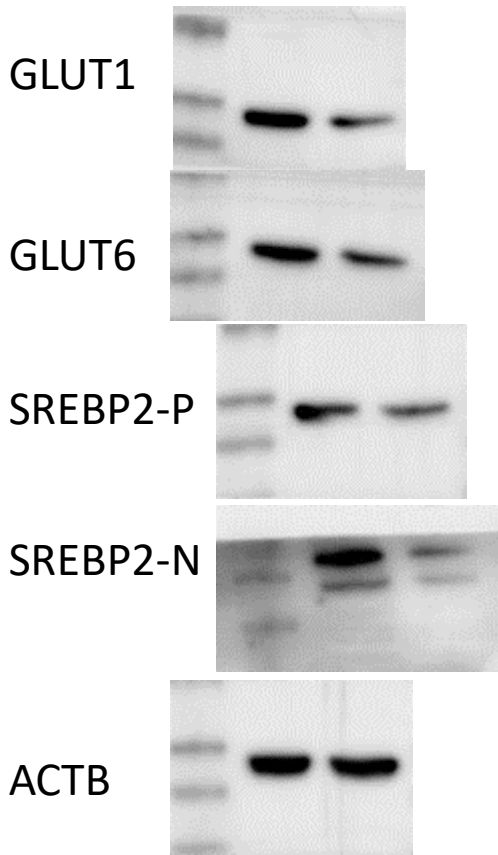

Fig.7f

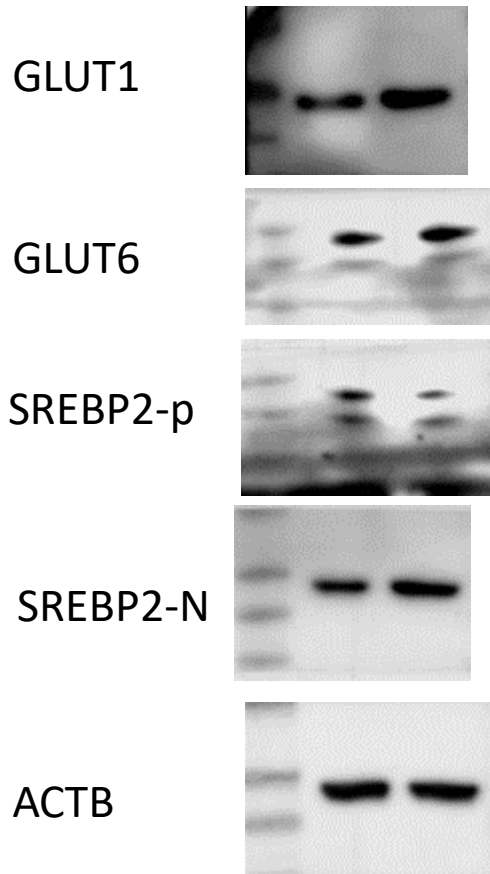

Fig.7g

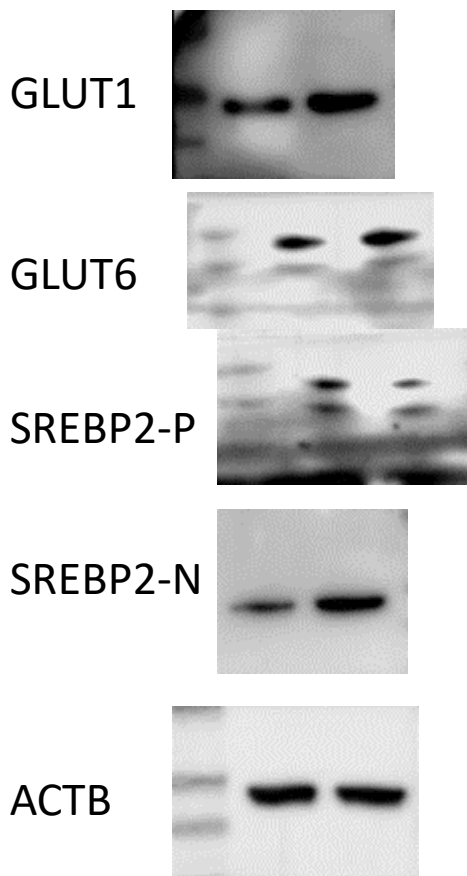



Fig.7h

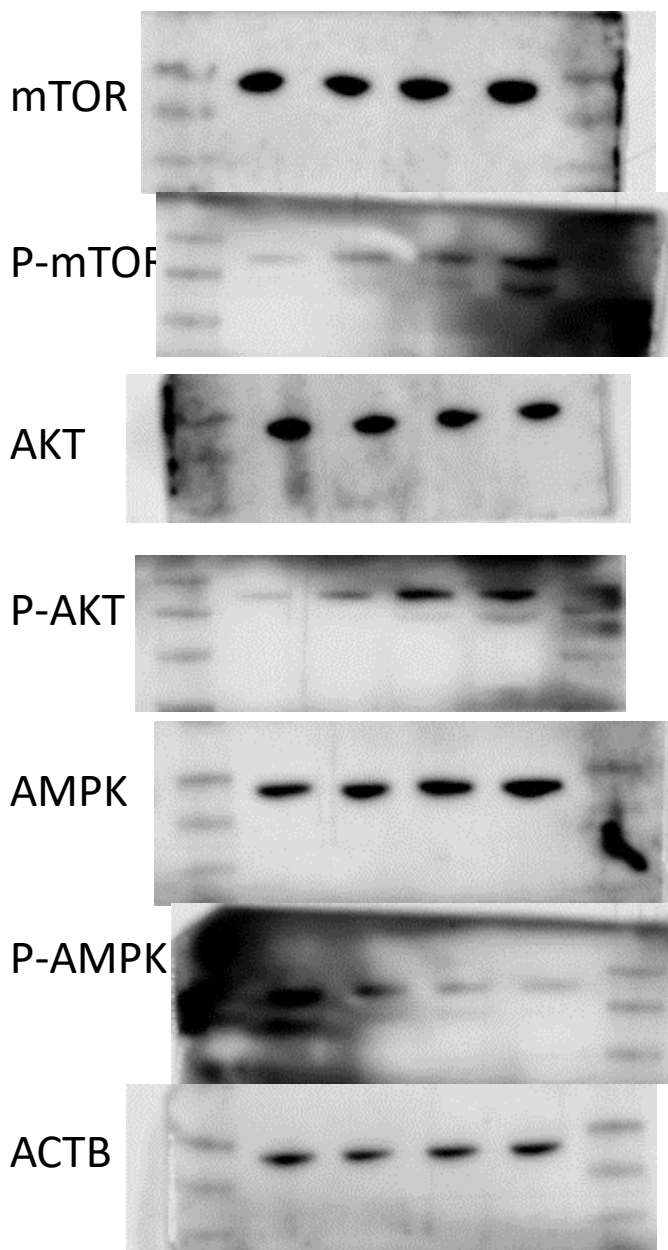

Fig.7i

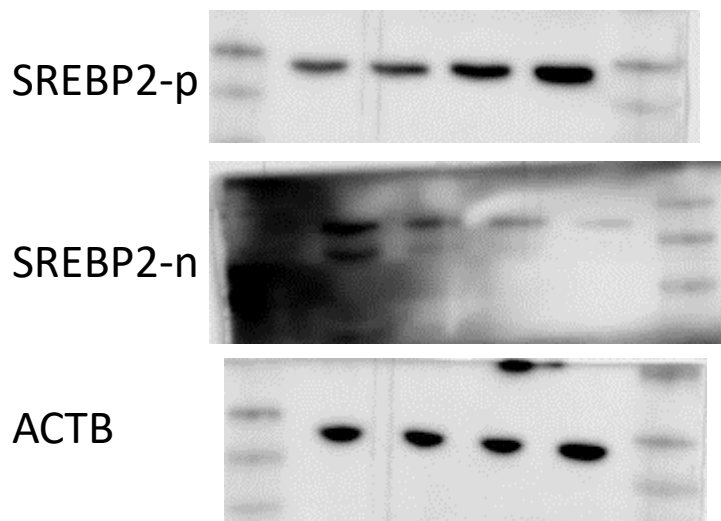

Supplement: 41419_2024_7169_MOESM2_ESM.pdf [file 41419_2024_7169_MOESM2_ESM.pdf]
