# Supplementary material for: Combined metformin and simvastatin therapy inhibits SREBP2 maturation and alters energy metabolism in glioma
Source: PubMed Central journal article supplement (PMC11550444; doi:10.1038/s41419-024-07169-5), 2024-11-09
Supplement: 41419_2024_7169_MOESM1_ESM.pdf [file 41419_2024_7169_MOESM1_ESM.pdf]

## 1 **Supplementary Materials and Methods**

### 2 **Data Processing and Differential Expression Analysis**

3 In this study, data processing and differential expression analysis were conducted using the Gene  
4 Expression Profiling Interactive Analysis (GEPIA) online database (<http://gepia2.cancer-pku.cn/>).  
5 GEPIA is a valuable online cancer microarray database utilized for exploring expression  
6 differences and prognostic correlations.

7 Gene expression correlation analysis was carried out using specific sets of The Cancer Genome  
8 Atlas (TCGA) expression data. The Spearman method was employed to determine the correlation  
9 coefficients. In the generated plots, LAYN was plotted on the x-axis, while other genes of interest  
10 were represented on the y-axis. Both tumor and normal tissue datasets were utilized for the  
11 analysis.

### 12 **Immunohistochemistry**

13 In this study, tissue samples from different grades of human gliomas (WHO grade I-IV) as well as  
14 normal brain tissues were formalin-fixed and paraffin-embedded to create 4 mm sections. To  
15 facilitate antigen retrieval, these sections were boiled in sodium citrate buffer (pH 6.0). To block  
16 endogenous horseradish peroxidase (HRP) activity, 3% H<sub>2</sub>O<sub>2</sub> was applied. The slides were then  
17 treated with a 10% normal goat serum and incubated with primary antibodies at 4°C overnight.  
18 The detection of signals was achieved using a secondary antibody conjugated with horseradish  
19 peroxidase and 3, 3'-diaminobenzidine (DAB) as the substrate. Subsequently, the slides were  
20 counterstained with hematoxylin. Representative images were captured using an Olympus  
21 inverted microscope. The staining intensity of glioma samples was quantified using the H-score  
22 method.

### 23 **Immunofluorescence assays**

24 Cells were grown on glass coverslip in confocal dish and were treated accordingly. Subsequently,  
25 the cells were fixed with 4% paraformaldehyde in PBS for 15 min, and 0.5% of Triton solution was  
26 added to penetrate the cytomembrane. After 12h incubation with primary antibodies at 4 °C,  
27 DAPI and fluorescence-dye conjugated staining kit secondary antibodies were used to detect the  
28 binding of primary antibody and the nuclei of fixed cells. Visualization of fixed cells was carried  
29 out using a confocal laser scanning microscope (Leica, STELLARIS 5 Cryo).

### 30 **RNA Extraction and Real-time Polymerase Chain Reaction (PCR)**

31 For RNA extraction, TRIzol reagents (Thermo, MA, USA) were employed following the  
32 manufacturer's guidelines. Subsequently, complementary DNA (cDNA) was synthesized using the  
33 GoScript reverse transcription system (TransGen Biotech, AE341-02).

34 Quantitative real-time PCR was conducted using TransStart Green qPCR SuperMix (TransGen  
35 Biotech, AQ111-02) on an ABI7500 real-time PCR system (Applied Biosystems), adhering to  
36 standard procedures. To normalize the cycle threshold (Ct) values for each gene, GAPDH  
37 expression levels were used as the reference. The  $2^{-\Delta\Delta Ct}$  method was applied for quantitative  
38 analysis, facilitating accurate comparison of gene expression levels across different samples.

39 The specific primers used in this study can be found in Table S2, ensuring the specificity and  
40 reliability of the PCR reactions for the targeted genes.

#### 41 **Western blot assay**

42 For western blot analysis, samples were separated on SDS-PAGE gels and transferred to PVDF  
43 membranes. Membranes were processed following the ECL western blot protocol by GE  
44 Healthcare. The following antibodies were used: anti-SREBP2 (1:500, Abcam, ab30682),  
45 anti-GLUT1 (1:500, Santa Cruz, sc-377228), anti-GLUT4 (1:500, Santa Cruz, sc-53566), anti-GLUT6  
46 (1:500, Santa Cruz, sc-373973), anti-mTOR (1:1000, Santa Cruz, sc-517464), anti-p-mTOR (1:1000,  
47 Santa Cruz, sc-293133), anti-AKT1 (1:1000, Santa Cruz, sc-5298), anti-pAKT1 (1:1000, Santa Cruz,  
48 sc-135650), anti-AMPK  $\alpha$ 1 (1:1000, CST, 2532), anti-p-AMPK $\alpha$  (1:1000, CST, 2535), anti-SCAP  
49 (1:1000, abcam, ab190103), anti-MBTPS1 (1:1000, Thermo, PA5-77103), and  $\beta$ -actin (1:1000,  
50 Sangon, D110001). Antibody validation was confirmed through the manufacturers' websites.

#### 51 **Cell Transfection**

52 Small interfering RNAs (siRNAs) targeting GLUT1 and GLUT6, along with a negative control (NC)  
53 siRNA, were obtained from Thermo. Cell transfections were conducted using Lipofectamine®  
54 2000 reagent (Thermo Fisher Scientific, Inc.) at 37 °C, with a concentration of 10 nM for vectors  
55 and 40 nM for siRNAs. The cells were incubated with the transfection mixtures for 24 h.

56 To assess transfection efficiency, both reverse transcription quantitative polymerase chain  
57 reaction (RT-qPCR) and western blot assays were performed. The primers used for RT-qPCR are  
58 provided in Table S2. These procedures ensured effective modulation of GLUT1 and GLUT6  
59 expression in the cells for subsequent analysis.

#### 60 **Cell Invasion and Migration Assays**



61 The migration and invasion capabilities of T98G and U87 cells were evaluated using Transwell  
62 chambers with 8  $\mu\text{m}$  pore size and 24-well inserts (Costar). For the invasion assay, the insert  
63 chamber membrane was coated with diluted matrigel (BD Biosciences) mixed with serum-free  
64 medium (1:40). After 48 hours of transfection, cells ( $0.8 \times 10^4$ ) in serum-free medium were  
65 added to the upper chamber, while the lower chamber contained medium with 10% fetal bovine  
66 serum (FBS).

67 In the migration assay, the same procedure was followed, except matrigel was not used.

68 Following incubation, cells that migrated or invaded into the lower chambers were counted  
69 under an inverted microscope (Olympus). These assays provided valuable insights into the cells'  
70 ability to migrate and invade crucial factors in cancer metastasis.

#### 71 **Cell Proliferation Assay**

72 Following a 48-hour period of transfection with Metformin or Simvastatin, T98G ,  
73 U87, LN229, U251 and HEB cells in the exponential growth phase were seeded into 96-well plates  
74 at a density of  $4 \times 10^3$  cells per well. Cell proliferation was assessed using the cell-counting kit-8  
75 (CCK-8, TransGen) according to the manufacturer's instructions. This assay allowed for a  
76 quantitative analysis of cell viability and proliferation in response to the treatments, providing  
77 essential information about the effects of Metformin and Simvastatin on cell growth.

#### 78 **TUNEL Assay**

79 To determine the apoptotic rate, T98G, U87, and HEB cells in the exponential growth phase were  
80 seeded into 96-well plates at a density of  $4 \times 10^3$  cells per well after 48 hours of transfection. The  
81 cells were fixed in a 4% formaldehyde solution for 20 minutes at room temperature and washed  
82 three times with PBS (Beyotime, Wuhan, China).

83 The TUNEL assay kit (Beyotime, Shanghai, China) containing terminal deoxynucleotidyl  
84 transferase (TdT) was prepared immediately before use following the manufacturer's protocol.  
85 Apoptotic cells in the sections were detected using a microscope (Nikon Corp., Tokyo, Japan). This  
86 assay allowed for the identification and quantification of apoptotic cells, providing crucial insights  
87 into the cellular response to the experimental conditions.

#### 88 **IP Assay**

89 U87-MG cells, T98G-MG cells and HEB cells were collected and incubated with the protein-A/G  
90 MagBeads (beyotime, Shanghai, China) and antibody. After overnight incubation, the immune

91 complexes were centrifuged and washed, and the proteins were detected by western blot with  
92 an anti-SCAP antibody (Santa, USA) and anti-SREBP2 antibody (ABclonal, China) according to the  
93 manufacturer's protocol.

#### 94 **Determination of Intracellular Acetyl-CoA Levels Using ELISA Assay**

95 To evaluate the influence of metformin and simvastatin on acetyl coenzyme A (Ac-CoA) (sangong,  
96 China) levels in U87, T98G, and HEB cells, we collected treated cells for each of the three cell lines  
97 and meticulously prepared standard curves in accordance with the manufacturer's guidelines.  
98 Following the established protocols, standard curves were meticulously generated. Subsequently,  
99 the optical density (OD) values of both the treatment and control groups were quantified using  
100 an enzyme-linked immunosorbent assay (ELISA) reader, with measurements taken at a  
101 wavelength of 450nm. Through a thorough analysis of these data, we aim to discern the extent of  
102 each drug's impact on Ac-CoA levels within distinct cell lines.

#### 103 **Measuring Total Cholesterol (TC) Content and Low-Density Lipoprotein (LDL) Content involved**

104 the utilization of specialized assay kits. The TC level was determined utilizing the TC Assay Kit  
105 from Solaibao, China, in adherence to the manufacturer's protocol. Evaluation of LDL Content  
106 was conducted using the Lactic Acid (LDL) HPLC Assay Kit from Solaibao, China, following the  
107 provided instructions. These assays are crucial for investigating cellular energy metabolism and  
108 diverse metabolic processes.

#### 109 **The Dual-Luciferase reporter gene assay**

110 The Dual Luciferase Reporter Gene Assay Kit, purchased from Yeasen Biotechnology (Shanghai)  
111 Co., Ltd. with catalog number 11402ES60. All procedures should be carried out according to the  
112 instruction manual. The constructed site information is as follows.

113

114

115

116

117

118

119

120

121

122

123

**Table S1 Samples information represented in Figure4b, Figure5b, h, Figure s3a, Figure s5a**

| Variable               | Samples (n=102) |
|------------------------|-----------------|
| Sex                    |                 |
| Male                   | 53              |
| Female                 | 49              |
| Age(year)              |                 |
| ≤50                    | 42              |
| >50                    | 60              |
| WHO grade              |                 |
| I                      | 2               |
| II                     | 19              |
| III                    | 16              |
| IV                     | 65              |
| Location               |                 |
| Frontal                | 41              |
| Parietal               | 8               |
| Occipital              | 11              |
| Temporal               | 42              |
| Histology              |                 |
| Oligodendroglioma      | 16              |
| Astrocytome            | 13              |
| Diffuse midline glioma | 17              |
| Glioblastoma           | 56              |

125

126

127

128

129

130

131

132

TableS2 Oligos used in the study

|                 |                                |
|-----------------|--------------------------------|
| <b>SREBF2-F</b> | <b>CTGGGAGACATCGACGAGAT</b>    |
| <b>SREBF2-R</b> | <b>GACCTGGGTGAATGACCGTT</b>    |
| <b>SLC2A1-F</b> | <b>CTTCACTGTCGTGTCGCTGT</b>    |
| <b>SLC2A1-R</b> | <b>GGCCACGATGCTCAGATAGG</b>    |
| <b>SLC2A2-F</b> | <b>CAATGCACCTCAACAGGTAATAA</b> |
| <b>SLC2A2-R</b> | <b>TGGCTTTGATTCTTCCAAGTGT</b>  |
| <b>SLC2A4-F</b> | <b>ACCTTGGTCTCGGTGTTGTT</b>    |
| <b>SLC2A4-R</b> | <b>GGCCACGATGAACCAAGGAA</b>    |
| <b>SLC2A6-F</b> | <b>AACGTCCGGAGACAGAGCA</b>     |
| <b>SLC2A6-R</b> | <b>GGTGCTGTCGAAGATGGACT</b>    |
| <b>GAPDH-F</b>  | <b>TGACTTCAACAGCGACACCCA</b>   |
| <b>GAPDH-R</b>  | <b>CACCCTGTTGCTGTAGCCAAA</b>   |

134

135 **Table S3.1: Half-maximal inhibitory concentrations (IC50) of different drugs in cell lines after 48**

136

**hours of treatment**

|                  | HEB   | U87   | T98G  | LN229 | U251  |
|------------------|-------|-------|-------|-------|-------|
| Metformin (mM)   | 9.516 | 6.945 | 7.204 | 2.885 | 9.046 |
| Simvastatin (uM) | 37.95 | 13.98 | 11.78 | 2.320 | 15.67 |

137

138

**Table S3.2: Concentrations of drugs used in combination therapy**

|                  | HEB | U87 | T98G | LN229 | U251 |
|------------------|-----|-----|------|-------|------|
| Metformin (mM)   | 2.5 | 1.5 | 1.5  | 0.5   | 2.5  |
| Simvastatin (uM) | 5.0 | 2.5 | 2.5  | 0.5   | 4.0  |

139

140

141

142

143

144

145

146

147

148

149

150

151

**Table S4: The binding sites of SREBP2 with SLC2A1/6**

| Gene   | Fragment length | Binding site |            | Fluorescence intensity (Luc value) |                    |       |
|--------|-----------------|--------------|------------|------------------------------------|--------------------|-------|
|        |                 | name         | sequence   | control group                      | experimental group | ratio |
| SLC2A1 | -257bp~+16bp    | 836          | AGGGGGTGAG | 56949.8                            | 98279.0            | 1.725 |
|        | -737bp~-257bp   | 764          | AGGAGGTGAT | 59387.2                            | 87817.8            | 1.478 |
|        | -764bp~-737bp   | 737          | CACCTGAACT | 56045.6                            | 176544.8           | 3.150 |
|        | -836bp~-764bp   | 257          | CTGACATGAT | 54900.0                            | 223402.5           | 4.069 |
| SLC2A6 | -263bp~+7bp     | 833          | GGGGCGTGAC | 60216.6                            | 172167.8           | 2.859 |
|        | -357bp~-263bp   | 357          | CAGGCGTGAC | 58292.75                           | 297511.0           | 5.104 |
|        | -833bp~-357bp   | 263          | AGGGCGTGAT | 63191.0                            | 187811.0           | 2.972 |

153

154

155

156

157

158

159

160

161

162

163

164

165

166

167

168

169

170

171 **Supplemental legend**

172 **Fig.S1 Supplemental Experimental Data**

173 (a) Kaplan-Meier plots of overall survival in glioma patients with high and low expressions of  
174 GLUT1, GLUT6, GLUT4, SREBP1, SREBP2 and VEGF; (b) Bioinformatics analysis indicated that  
175 GLUT1, GLUT6, GLUT4, SREBP1, SREBP2 and VEGF expression level in GBM tissues (n = 163) was  
176 significantly upregulated than normal tissues (n = 207); (c) SREBP2 mRNA expression in gliomas is  
177 generally lower than in normal brain tissue, and the expression level of SREBP2 is lower in  
178 high-grade gliomas compared to low-grade gliomas; (d) Immunofluorescence staining to detect  
179 the localization of SCAP and SREBP2 in U87 cells.

180 **Fig.S2 Measurement of Half Inhibitory Concentration (IC50) for Metformin and Simvastatin in**  
181 **Cells**

182 (a) U87, LN229, T98G, U251, and HEB cells were treated with Metformin, and cell proliferation  
183 was assessed using CCK8 assay after 48 hours (n=3); (b) IC50 values were calculated using  
184 GraphPad Prism 7. (c) U87, LN229, T98G, U251, and HEB cells were treated with Simvastatin, and  
185 cell proliferation was assessed after 48 hours (n=3); (d) IC50 values were calculated. (e) After 48  
186 hours of treatment with low concentrations of metformin, simvastatin, and their combination,  
187 cell viability decreased significantly. All experiments were conducted in triplicate, and the data  
188 are expressed as the mean  $\pm$  standard deviation. Statistical significance is denoted by \*P < 0.05,  
189 \*\*P < 0.01, and \*\*\*P < 0.001, as determined by a two-tailed Student's t-test.

190 **Fig.S3 Primary Glioma SREBP2 Expression**

191 Supplemental immunohistochemistry images illustrate the expression levels of SREBP2 precursor  
192 and mature forms in primary gliomas of different grades.

193 **Fig.S4 Primary and Recurrent Glioma SREBP2 Expression**

194 Supplemental immunohistochemistry images depict the expression levels of SREBP2 precursor  
195 and mature forms in primary and recurrent gliomas of varying grades.

196

**Figure S1**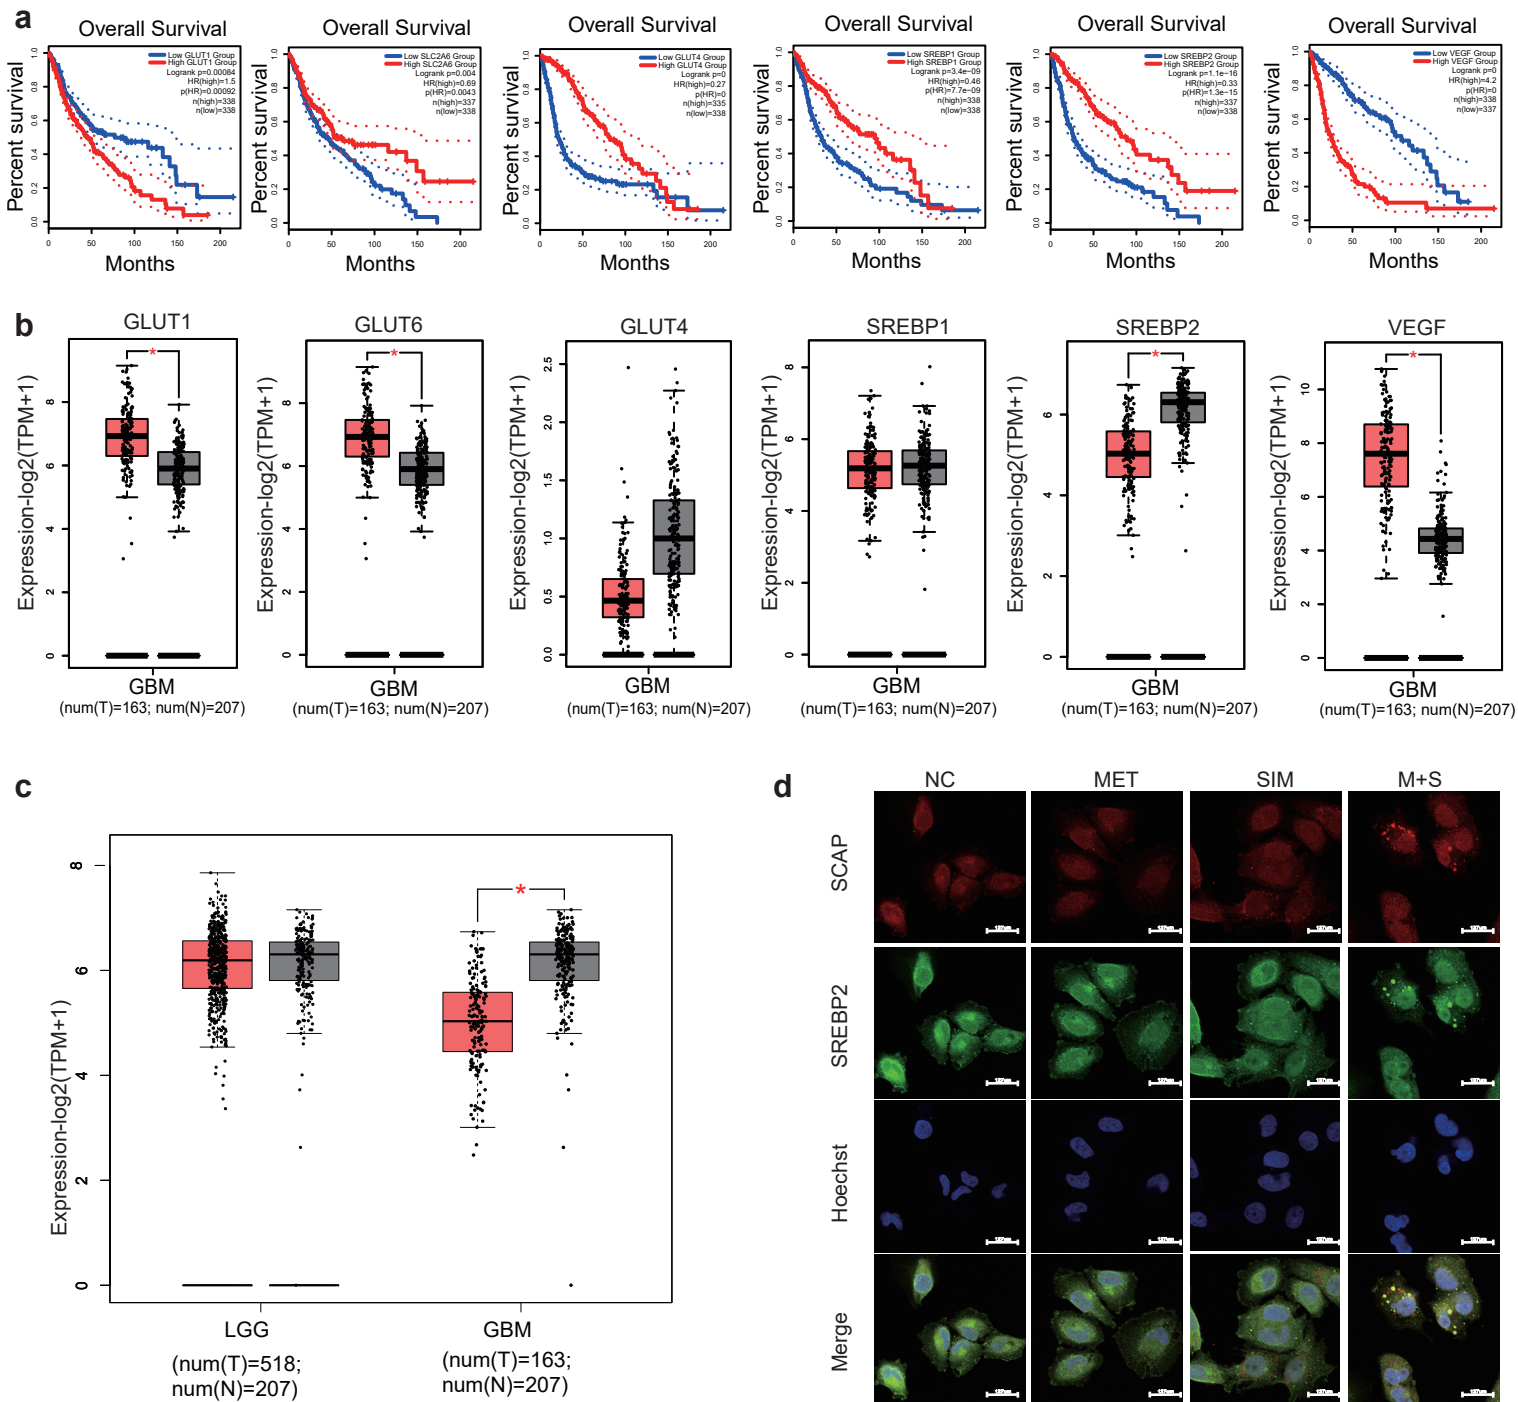

**Figure S2**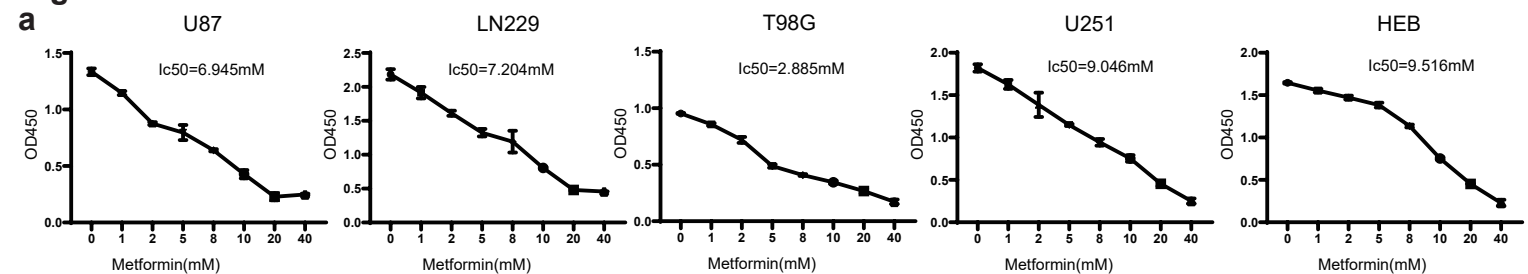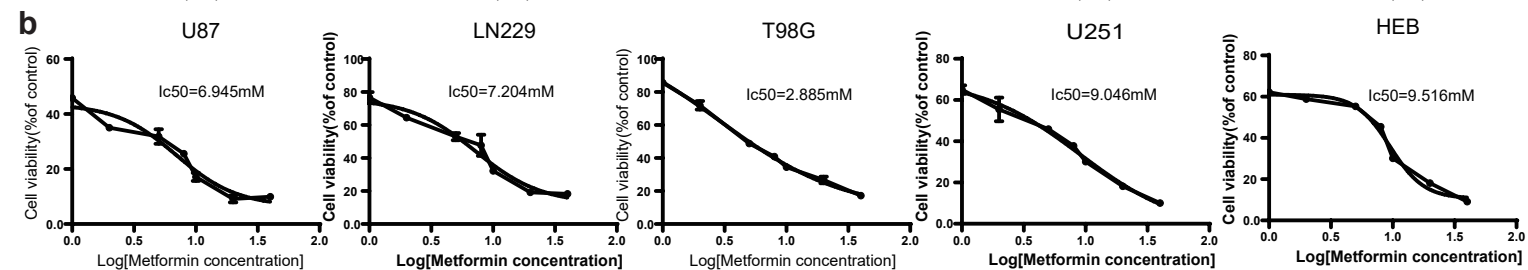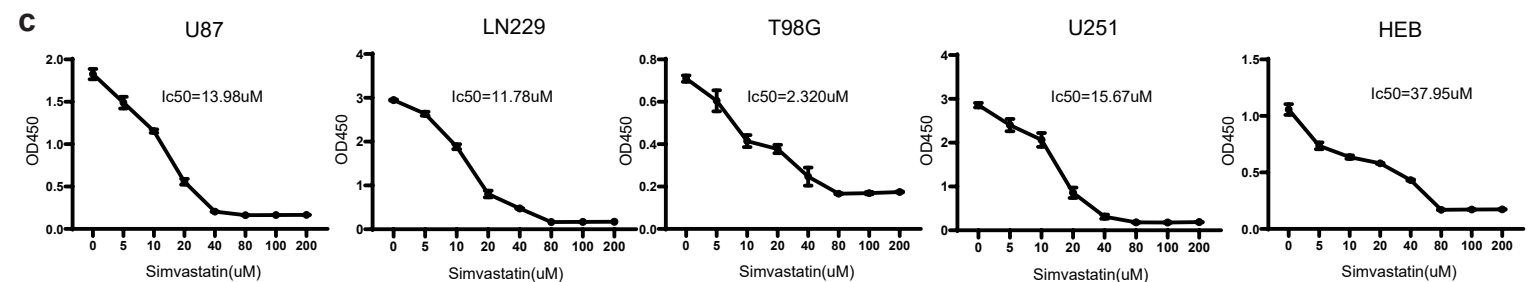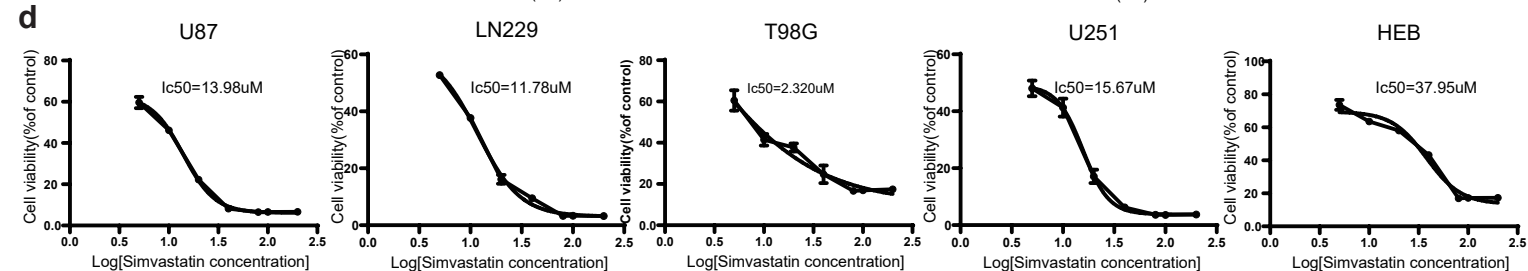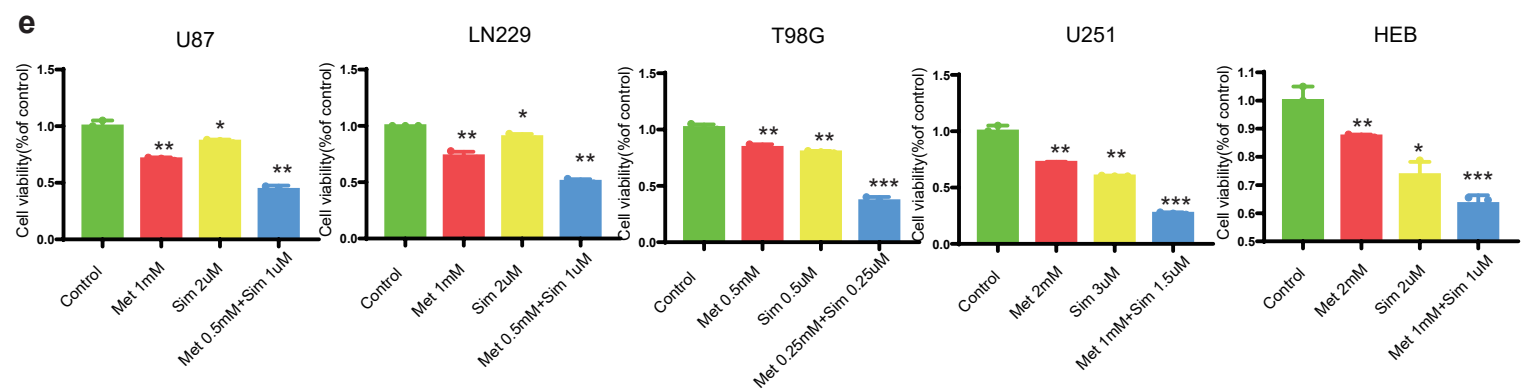



**Figure S3**

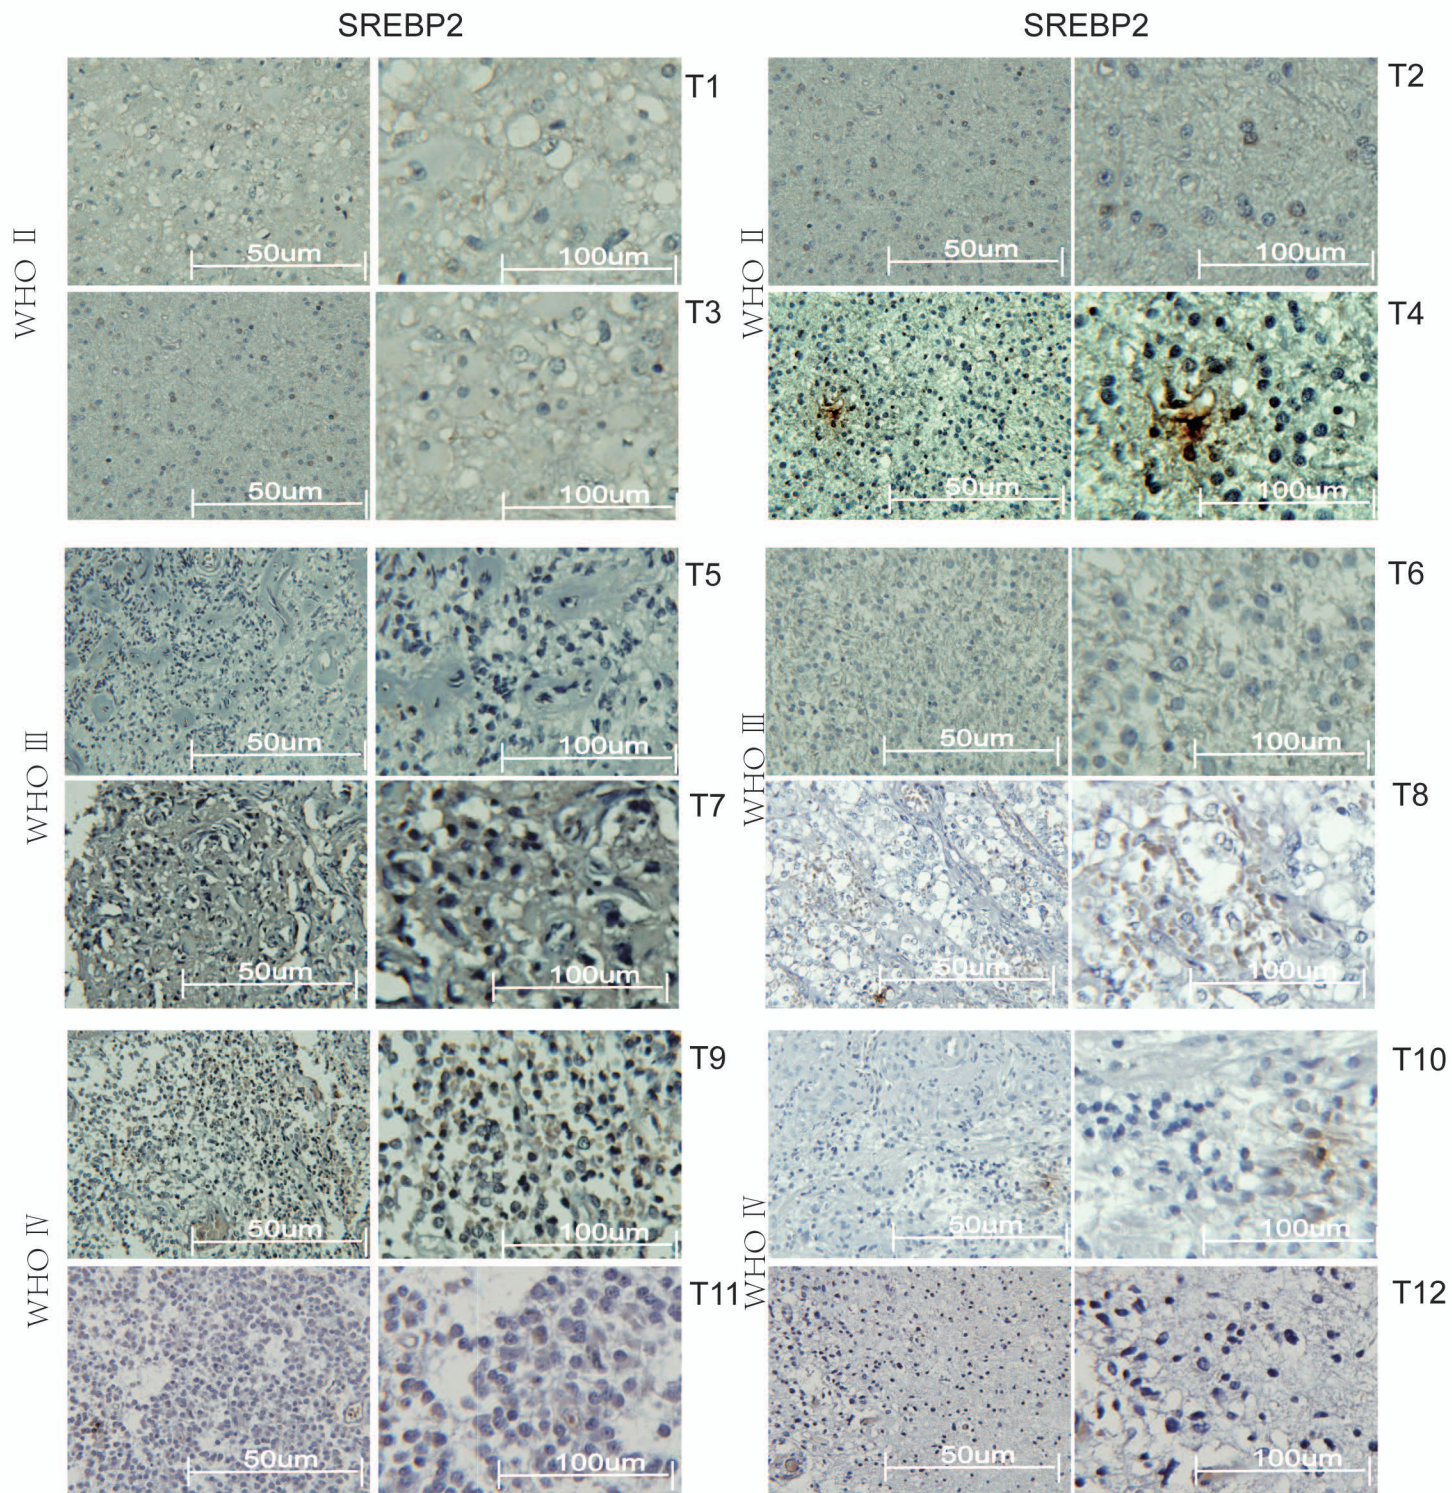



**Figure S4**

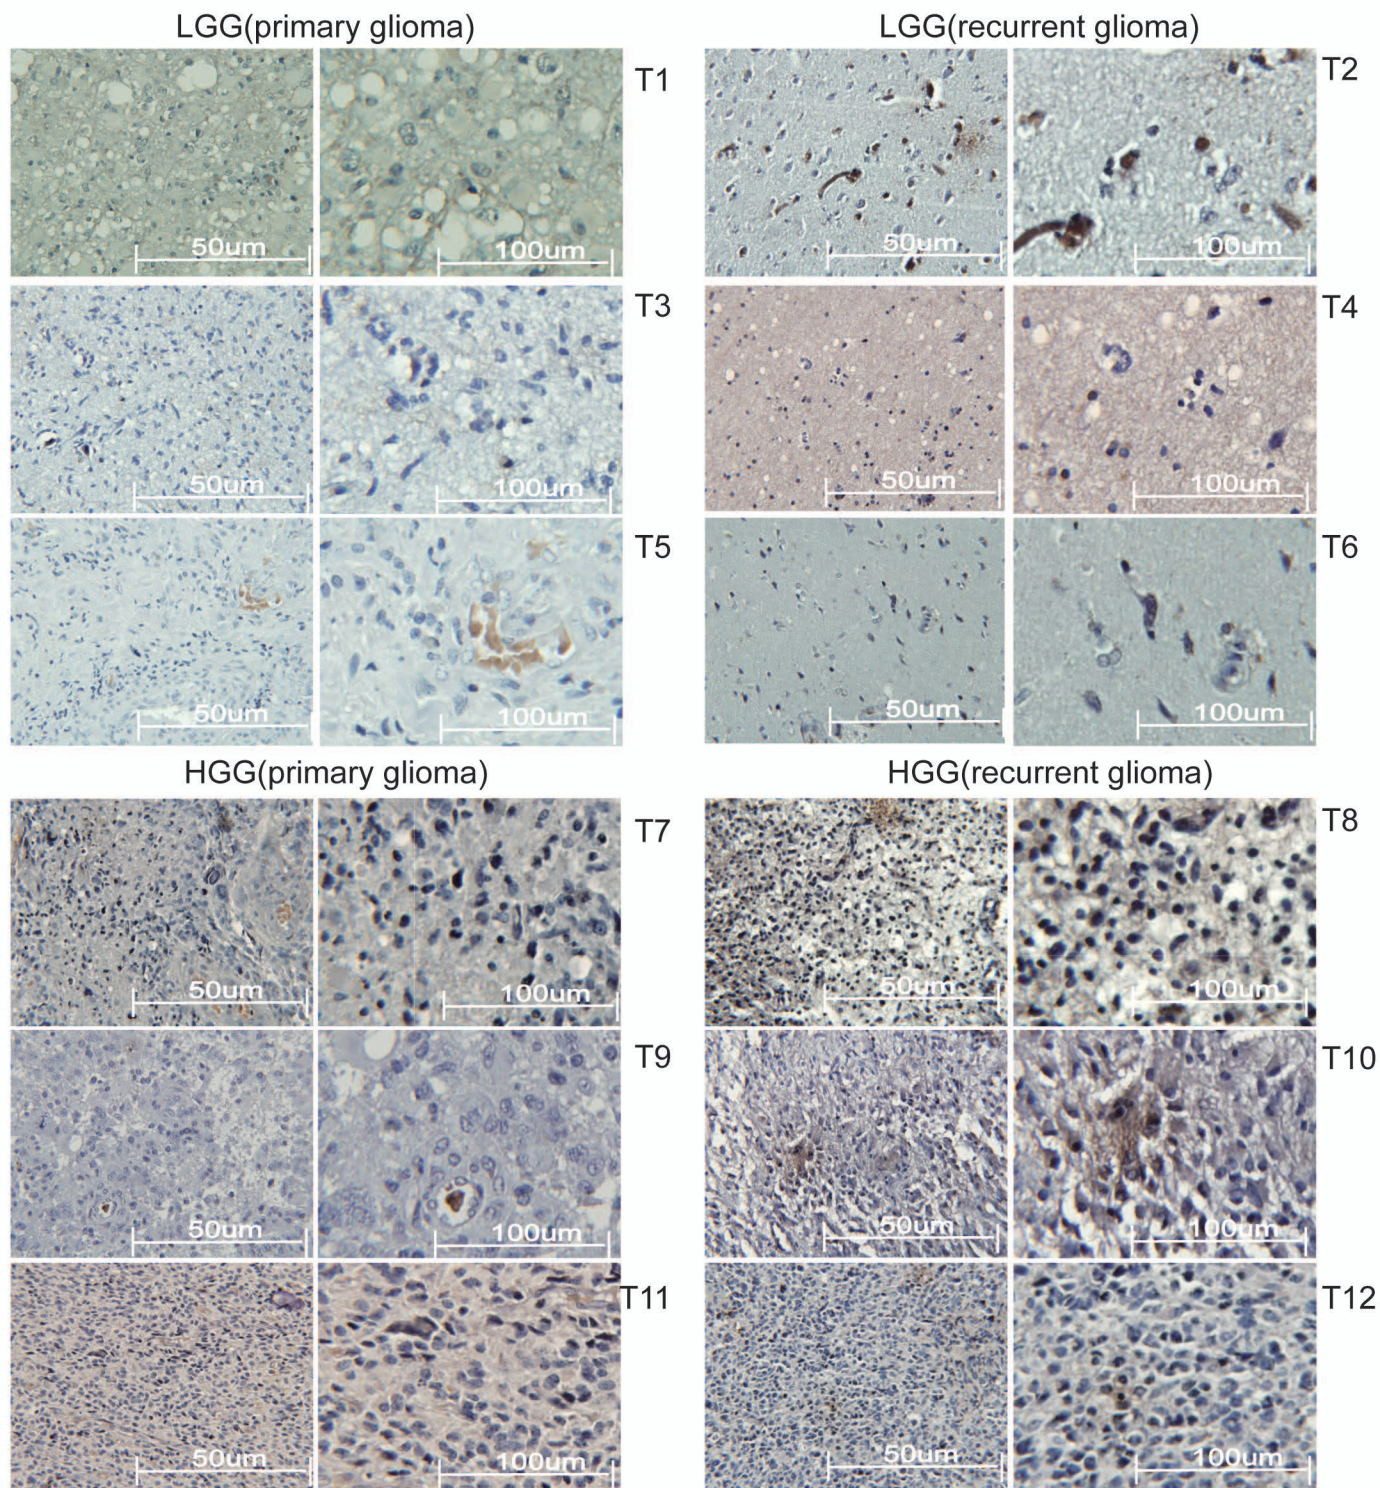

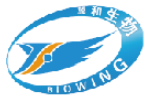

# HEB Identification Report

## 细胞遗传质量鉴定检测

## Cell Line Authentication Service

### STR 基因型检测报告

**送检单位：上海澳音生物科技有限公司**

**检品名称：细胞系**

**委托单位：上海翼和应用生物技术有限公司**

**报告日期：2023-05-17**

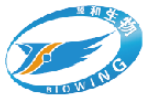

# 报告说明

1. 本报告只对送检的来样负责。
2. 检验报告上的检验结果和检验单位名称，未经同意不得用于广告、评优及商业宣传。
3. 对本报告有异议，请于收到报告之日起十五日内以书面方式提出，逾期不予受理。
4. 对纸质检验报告涂改、增删，或未加盖检验单位印章的复印件均无效。



# 样品信息

**样品编号:**

| 客户样本编号  | 公司编号        |
|---------|-------------|
| SAc0560 | 20230512-02 |

**样品性状:** 细胞系

**检测项目:** STR

**送检单位:** 上海澳音生物科技有限公司

**检测方法:** 用 Axygen 的基因组抽提试剂盒提取 DNA, 采用 21- STR 扩增方案扩增, 在 ABI 3730XL 型遗传分析仪上对 STR 位点和性别基因 Amelogenin 进行检测。



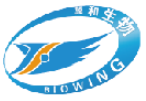

# 检测结果

## (一) 检验基本情况

| 公司编号        | 多等位基因 | 匹配细胞系 | 细胞库  | EV 值 | 匹配说明 |
|-------------|-------|-------|------|------|------|
| 20230512-02 | 无     |       | DSMZ |      | 无匹配  |

样本基因型检验结果

- 多等位基因指三等位及以上基因现象。
- 本次检测各细胞分型结果良好。

## (二) 各样本描述

- 20230512-02: 该株细胞 DNA 分型在细胞系检索中**没有找到匹配**的细胞系。本次检测在该细胞系中**发现多等位基因**。该细胞株未发现人源交叉污染，因数据库未登录 HEB 相关 STR 数据信息，无法显示匹配结果，若发表论文可提交该数据给杂志。

| EV | Cell No. | Cell name                | Locus names |         |        |          |       |      |     |      |        |
|----|----------|--------------------------|-------------|---------|--------|----------|-------|------|-----|------|--------|
|    |          |                          | D5S818      | D13S317 | D7S820 | D16S539  | VWA   | TH01 | AM  | TPOX | CSF1PO |
|    |          | <i>Query (Your Cell)</i> | 7,9         | 9,11    | 11,11  | 11,12,13 | 16,18 | 7,9  | X,Y | 8,11 | 11,12  |

**备注：**待测细胞系与收录于 ATCC, DSMZ, JCRB 和 RIKEN 数据库的细胞系 STR 数据进行比对，未收录于以上细胞库的细胞系将无法匹配。

**(三) 样本分型结果**

| 细胞的 STR 位点和 Amelogenin 位点的基因分型结果 |                |         |         |              |         |         |
|----------------------------------|----------------|---------|---------|--------------|---------|---------|
| Loci                             | 送检细胞 STR 信息    |         |         | 细胞库细胞 STR 信息 |         |         |
|                                  | 送检细胞名: SAc0560 |         |         | 细胞库细胞名:      |         |         |
|                                  | Allele1        | Allele2 | Allele3 | Allele1      | Allele2 | Allele3 |
| D5S818                           | 7              | 9       |         |              |         |         |
| D13S317                          | 9              | 11      |         |              |         |         |
| D7S820                           | 11             | 11      |         |              |         |         |
| D16S539                          | 11             | 13      |         |              |         |         |
| VWA                              | 16             | 18      |         |              |         |         |
| TH01                             | 7              | 9       |         |              |         |         |
| AMEL                             | X              | Y       |         |              |         |         |
| TPOX                             | 8              | 11      |         |              |         |         |
| CSF1PO                           | 11             | 12      |         |              |         |         |
| D12S391                          | 17             | 20      |         |              |         |         |
| FGA                              | 19             | 21      |         |              |         |         |
| D2S1338                          | 19             | 24      |         |              |         |         |
| D21S11                           | 29             | 30      |         |              |         |         |
| D18S51                           | 15             | 17      |         |              |         |         |
| D8S1179                          | 12             | 13      |         |              |         |         |
| D3S1358                          | 15             | 18      |         |              |         |         |
| D6S1043                          | 10             | 14      |         |              |         |         |
| PENTAE                           | 9              | 13      |         |              |         |         |
| D19S433                          | 15             | 15.2    |         |              |         |         |
| PENTAD                           | 9              | 9       |         |              |         |         |
| D1S1656                          | 16             | 18      |         |              |         |         |



# 其他说明

## (一) 分型方案及位点分布

|   | 方案 1    | 方案 2    | 方案 3    | 方案 4    |
|---|---------|---------|---------|---------|
| 1 | D3S1358 | D8S1179 | D19S433 | AMEL    |
| 2 | VWA     | D21S11  | TH01    | D1S1656 |
| 3 | D7S820  | D16S539 | D13S317 | D5S818  |
| 4 | CSF1PO  | D2S1338 | TPOX    | D12S391 |
| 5 | PENTAE  | PENTAD  | D18S51  | FGA     |
| 6 |         |         | D6S1043 |         |

实验方案及位点

## (二) STR 数据库比对

本公司采用 DSMZ tools 进行细胞系比对，其中包含来自于 ATCC, DSMZ, JCRB 和 RIKEN 数据库的 2455 个细胞系 STR 数据。如果待检测细胞未收录于以上细胞库或这是自行建立的新细胞系将无法进行比对，用户需根据细胞分型结果自行与其他数据库进行比对。

## (三) 文献引用参考

1. Authentication testing of HEK 293T and HeLa cell lines have been performed by Shanghai Biowing Applied Biotechnology Co.,Ltd via STR profiling. STR profiles match the standards recommended for HEK 293T and HeLa cell lines authentication
2. AGS, NCI-N87, HGC-27 and HEK293 were STR-authenticated on Dec. 8, 2015 by Shanghai Biowing Applied Biotechnology Co. LTD, Shanghai, China

主要实验人员：何秀川

复核人：张晨茜

负责人：王敏

签发日期：2023-05-17



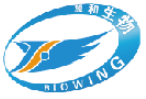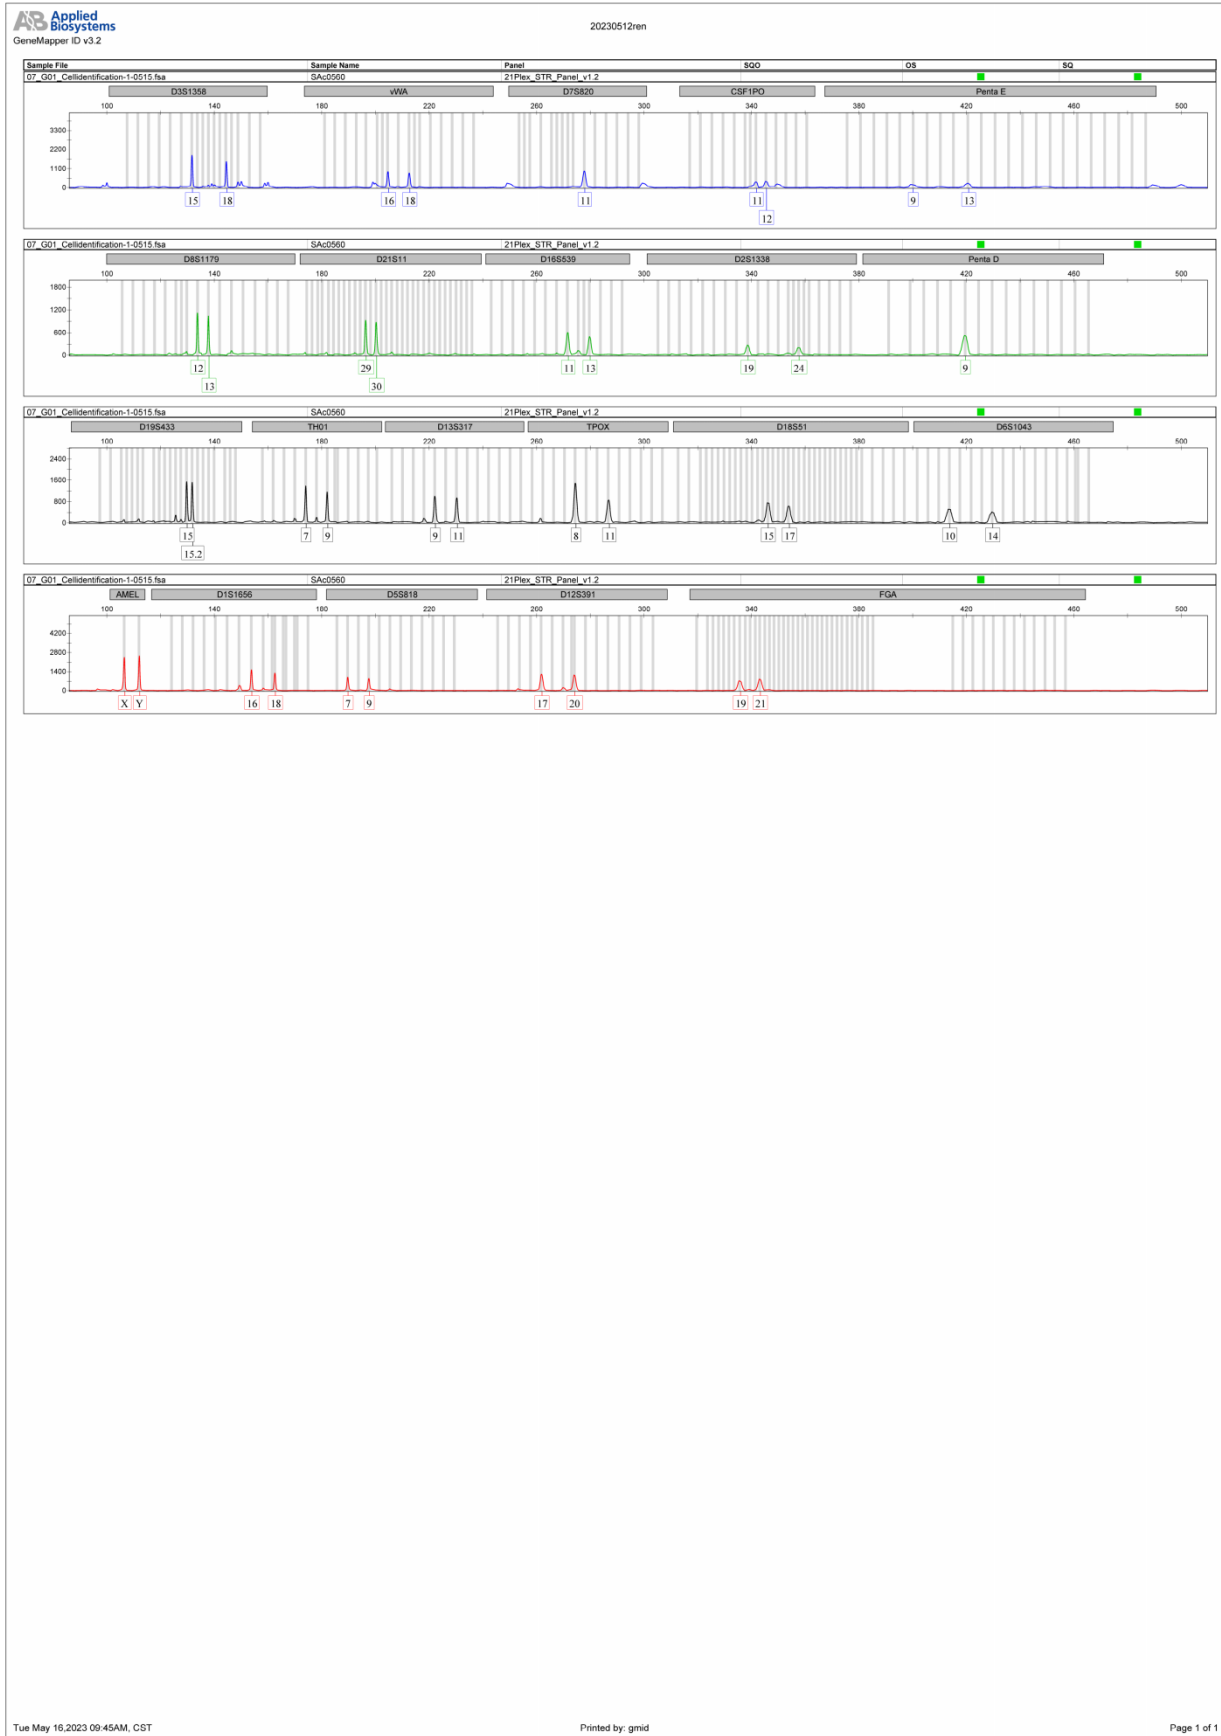

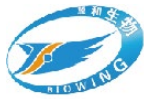

# T98G Identification Report

## 细胞遗传质量鉴定检测

### Cell Line Authentication Service

---

#### STR 基因型检测报告

**送检单位:** 赛百慷

**检品名称:** 细胞系

**委托单位:** 上海翼和应用生物技术有限公司

**报告日期:** 2022-06-14

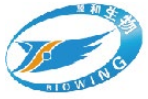

# 报告说明

1. 本报告只对送检的来样负责。
2. 检验报告上的检验结果和检验单位名称，未经同意不得用于广告、评优及商业宣传。
3. 对本报告有异议，请于收到报告之日起十五日内以书面方式提出，逾期不予受理。
4. 对纸质检验报告涂改、增删，或未加盖检验单位印章的复印件均无效。

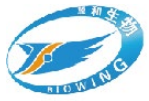

# 样品信息

**样品编号:**

| 客户样本编号 | 公司编号        |
|--------|-------------|
| T98G   | 20220607-08 |

**样品数量:** 1

**样品性状:** 细胞系

**检测项目:** STR

**送检单位:** 赛百慷

**检测方法:** 用 Axygen 的基因组抽提试剂盒提取 DNA, 采用 21- STR 扩增方案扩增, 在 ABI 3730XL 型遗传分析仪上对 STR 位点和性别基因 Amelogenin 进行检测。



# 检测结果

## (一) 检验基本情况

| 公司编号        | 多等位基因 | 匹配细胞系        | 细胞库  | EV 值 | 匹配说明 |
|-------------|-------|--------------|------|------|------|
| 20220607-08 | 无     | T98G [T98-G] | DSMZ | 1.0  | 完全匹配 |

样本基因型检验结果

- 多等位基因指三等位及以上基因现象。
- 本次检测各细胞分型结果良好。

## (二) 各样本描述

- 20220607-08: 该株细胞 DNA 分型在细胞系检索中找到**完全匹配**的细胞系, DSMZ 数据库显示细胞名为 **T98G [T98-G]**, 细胞号对应 **CRL-1690**。本次检测在该细胞系中**没有发现多等位基因**。

**备注:** 待测细胞系与收录于 ATCC, DSMZ, JCRB 和 RIKEN 数据库的细胞系 STR 数据进行比对, 未收录于以上细胞库的细胞系将无法匹配。

| EV          | Cell No.                 | Cell name    | Locus names |          |         |          |          |          |        |        |          |
|-------------|--------------------------|--------------|-------------|----------|---------|----------|----------|----------|--------|--------|----------|
|             |                          |              | D5S818      | D13S317  | D7S820  | D16S539  | VWA      | TH01     | AM     | TPOX   | CSF1PO   |
|             | <i>Query (Your Cell)</i> |              | 10,12       | 13,13    | 9,10    | 13,13    | 17,20    | 7,9.3    | X,Y    | 8,8    | 10,12    |
| 1.0(36/36)  | CRL-1690                 | T98G [T98-G] | [10, 12]    | [13, 13] | [9, 10] | [13, 13] | [17, 20] | [7, 9.3] | [X, Y] | [8, 8] | [10, 12] |
| 1.0(36/36)  | IFO50303                 | T98G         | [10, 12]    | [13, 13] | [9, 10] | [13, 13] | [17, 20] | [7, 9.3] | [X, Y] | [8, 8] | [10, 12] |
| 1.0(36/36)  | JCRB9041                 | T98G         | [10, 12]    | [13, 13] | [9, 10] | [13, 13] | [17, 20] | [7, 9.3] | [X, Y] | [8, 8] | [10, 12] |
| 1.0(36/36)  | RCB1954                  | T98G         | [10, 12]    | [13, 13] | [9, 10] | [13, 13] | [17, 20] | [7, 9.3] | [X, Y] | [8, 8] | [10, 12] |
| 0.94(34/36) | CVCL_0556Best            | T98G         | [10, 12]    | [13, 13] | [9, 9]  | [13, 13] | [17, 20] | [7, 9.3] | [X, Y] | [8, 8] | [10, 12] |

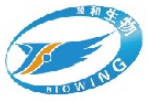

(三) 样本分型结果

| 细胞 20220607-08 的 STR 位点和 Amelogenin 位点的基因分型结果 |             |         |         |                      |         |         |
|-----------------------------------------------|-------------|---------|---------|----------------------|---------|---------|
| Loci                                          | 送检细胞 STR 信息 |         |         | 细胞库细胞 STR 信息         |         |         |
|                                               | 送检细胞名: T98G |         |         | 细胞库细胞名: T98G [T98-G] |         |         |
|                                               | Allele1     | Allele2 | Allele3 | Allele1              | Allele2 | Allele3 |
| D5S818                                        | 10          | 12      |         | 10                   | 12      |         |
| D13S317                                       | 13          | 13      |         | 13                   | 13      |         |
| D7S820                                        | 9           | 10      |         | 9                    | 10      |         |
| D16S539                                       | 13          | 13      |         | 13                   | 13      |         |
| VWA                                           | 17          | 20      |         | 17                   | 20      |         |
| TH01                                          | 7           | 9.3     |         | 7                    | 9.3     |         |
| AMEL                                          | X           | Y       |         | X                    | Y       |         |
| TPOX                                          | 8           | 8       |         | 8                    | 8       |         |
| CSF1PO                                        | 10          | 12      |         | 10                   | 12      |         |
| D12S391                                       | 17          | 18      |         |                      |         |         |
| FGA                                           | 21          | 21      |         |                      |         |         |
| D2S1338                                       | 19          | 24      |         |                      |         |         |
| D21S11                                        | 28          | 32.2    |         |                      |         |         |
| D18S51                                        | 13          | 16      |         |                      |         |         |
| D8S1179                                       | 13          | 14      |         |                      |         |         |
| D3S1358                                       | 16          | 16      |         |                      |         |         |
| D6S1043                                       | 14          | 14      |         |                      |         |         |
| PENTAE                                        | 16          | 16      |         |                      |         |         |
| D19S433                                       | 12          | 12      |         |                      |         |         |
| PENTAD                                        | 10          | 11      |         |                      |         |         |
| D1S1656                                       | 14          | 17      |         |                      |         |         |



# 其他说明

## (一) 分型方案及位点分布

|   | 方案 1    | 方案 2    | 方案 3    | 方案 4    |
|---|---------|---------|---------|---------|
| 1 | D3S1358 | D8S1179 | D19S433 | AMEL    |
| 2 | VWA     | D21S11  | TH01    | D1S1656 |
| 3 | D7S820  | D16S539 | D13S317 | D5S818  |
| 4 | CSF1PO  | D2S1338 | TPOX    | D12S391 |
| 5 | PENTAE  | PENTAD  | D18S51  | FGA     |
| 6 |         |         | D6S1043 |         |

实验方案及位点

## (二) STR 数据库比对

本公司采用 DSMZ tools 进行细胞系比对，其中包含来自于 ATCC, DSMZ, JCRB 和 RIKEN 数据库的 2455 个细胞系 STR 数据。如果待检测细胞未收录于以上细胞库或这是自行建立的新细胞系将无法进行比对，用户需根据细胞分型结果自行与其他数据库进行比对。

## (三) 文献引用参考

1. Authentication testing of HEK 293T and HeLa cell lines have been performed by Shanghai Biowing Applied Biotechnology Co.,Ltd via STR profiling. STR profiles match the standards recommended for HEK 293T and HeLa cell lines authentication
2. AGS, NCI-N87, HGC-27 and HEK293 were STR-authenticated on Dec. 8, 2015 by Shanghai Biowing Applied Biotechnology Co. LTD, Shanghai, China

**主要实验人员:** 张佳男

**复核人:** 钱宁

**负责人:** 白杨

**签发日期:** 2022-06-14

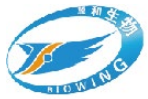

# U87 Identification Report

## 细胞遗传质量鉴定检测

### Cell Line Authentication Service

---

#### STR 基因型检测报告

**送检单位:** 赛百慷

**检品名称:** 细胞系

**委托单位:** 上海翼和应用生物技术有限公司

**报告日期:** 2022年06月14日



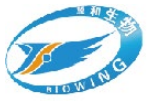

# 报告说明

1. 本报告只对送检的来样负责。
2. 检验报告上的检验结果和检验单位名称，未经同意不得用于广告、评优及商业宣传。
3. 对本报告有异议，请于收到报告之日起十五日内以书面方式提出，逾期不予受理。
4. 对纸质检验报告涂改、增删，或未加盖检验单位印章的复印件均无效。



# 样品信息

**样品编号:**

|        |             |
|--------|-------------|
| 客户样本编号 | 公司编号        |
| U87MG  | 20220607-12 |

**样品数量:** 1

**样品性状:** 细胞系

**检测项目:** STR

**送检单位:** 赛百慷

**检测方法:** 用 Axygen 的基因组抽提试剂盒提取 DNA, 采用 20- STR 扩增方案扩增, 在 ABI 3730XL 型遗传分析仪上对 STR 位点和性别基因 Amelogenin 进行检测。

# 检测结果

## (一) 检验基本情况

|             | 多等位基因 | 匹配细胞系  | 细胞库  | EV 值 | 匹配说明 |
|-------------|-------|--------|------|------|------|
| 20220607-12 | 有     | U-87MG | DSMZ | 1    | 完全匹配 |

样本基因型检验结果

- 多等位基因指三等位及以上基因现象。
- 本次检测各细胞分型结果良好。

## (二) 各样本描述

20220607-12: 该株细胞 DNA 分型在细胞系检索中找到**完全匹配**的细胞系, DSMZ 数据库显示细胞名为 **U-87MG**, 细胞号对应 **HTB-14**。本次检测在该细胞系中**发现多等位基因**。

**备注:** 待测细胞系与收录于 ATCC, DSMZ, JCRB 和 RIKEN 数据库的细胞系 STR 数据进行比对, 未收录于以上细胞库的细胞系将无法匹配。

| EV          | Cell No. | Cell name                | Locus names |         |        |         |       |         |     |      |        |   | Figures |
|-------------|----------|--------------------------|-------------|---------|--------|---------|-------|---------|-----|------|--------|---|---------|
|             |          |                          | D5S818      | D13S317 | D7S820 | D16S539 | VWA   | TH01    | AM  | TPOX | CSF1PO |   |         |
|             |          | <i>Query (Your Cell)</i> | 11,12       | 8,11    | 8,9    | 12,12   | 15,17 | 9,3,9,3 | x,x | 8,8  | 10,11  |   |         |
| 1.00(36/36) | HTB-14   | U-87MG                   | 11,12       | 8,11    | 8,9    | 12,12   | 15,17 | 9,3,9,3 | X,X | 8,8  | 10,11  | - |         |
| 0.72(26/36) | 731      | CAKI-1                   | 11,12       | 11,11   | 8,12   | 12,12   | 15,17 | 6,8     | X,X | 8,11 | 10,11  | - |         |
| 0.72(26/36) | 749      | U-CH2                    | 10,11       | 11,11   | 8,12   | 12,12   | 17,17 | 9,3,9,3 | X,X | 8,8  | 11,12  | - |         |
| 0.72(26/36) | CRL-5842 | NCI-H774 [H774]          | 11,11       | 8,8     | 9,11   | 12,12   | 15,17 | 6,9,3   | X,X | 8,8  | 10,10  | - |         |
| 0.72(26/36) | CRL-5910 | NCI-H1994 [H1994]        | 10,11       | 11,11   | 9,11   | 12,12   | 15,19 | 7,9,3   | X,X | 8,8  | 10,11  | - |         |
| 0.72(26/36) | CRL-7064 | Hs 94.T                  | 11,12       | 12,13   | 8,9    | 9,12    | 17,18 | 7,9,3   | X,X | 8,8  | 10,11  | - |         |



(三) 样本分型结果

| 细胞 20220607-12 的 STR 位点和 Amelogenin 位点的基因分型结果 |              |         |         |                |         |         |
|-----------------------------------------------|--------------|---------|---------|----------------|---------|---------|
| Loci                                          | 送检细胞 STR 信息  |         |         | 细胞库细胞 STR 信息   |         |         |
|                                               | 送检细胞名: U87MG |         |         | 细胞库细胞名: U-87MG |         |         |
|                                               | Allele1      | Allele2 | Allele3 | Allele1        | Allele2 | Allele3 |
| D5S818                                        | 11           | 12      | 13      | 11             | 12      |         |
| D13S317                                       | 8            | 11      |         | 8              | 11      |         |
| D7S820                                        | 8            | 9       |         | 8              | 9       |         |
| D16S539                                       | 12           | 12      |         | 12             | 12      |         |
| VWA                                           | 15           | 17      |         | 15             | 17      |         |
| TH01                                          | 9.3          | 9.3     |         | 9.3            | 9.3     |         |
| AMEL                                          | X            | X       |         | X              | X       |         |
| TPOX                                          | 8            | 8       |         | 8              | 8       |         |
| CSF1PO                                        | 10           | 11      |         | 10             | 11      |         |
| D12S391                                       | 18           | 21      |         |                |         |         |
| FGA                                           | 18           | 24      |         |                |         |         |
| D2S1338                                       | 20           | 23      |         |                |         |         |
| D21S11                                        | 28           | 32.2    |         |                |         |         |
| D18S51                                        | 13           | 13      |         |                |         |         |
| D8S1179                                       | 10           | 11      |         |                |         |         |
| D3S1358                                       | 16           | 17      |         |                |         |         |
| D6S1043                                       | 11           | 18      |         |                |         |         |
| PENTAE                                        | 7            | 14      |         |                |         |         |
| D19S433                                       | 15           | 15.2    |         |                |         |         |
| PENTAD                                        | 9            | 14      |         |                |         |         |

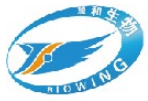

# 其他说明

## (一) 分型方案及位点分布

|   | 方案 1    | 方案 2    | 方案 3    | 方案 4    |
|---|---------|---------|---------|---------|
| 1 | TH01    | TPOX    | D3S1358 | AMEL    |
| 2 | D12S391 | VWA     | D13S317 | D5S818  |
| 3 | D7S820  | D8S1179 | D6S1043 | D2S1338 |
| 4 | CSF1PO  | PENTAD  | D16S539 | D21S11  |
| 5 | FGA     |         | D19S433 | D18S51  |
| 6 | PENTAE  |         |         |         |

实验方案及位点

## (二) STR 数据库比对

本公司采用 DSMZ tools 进行细胞系比对，其中包含来自于 ATCC, DSMZ, JCRB 和 RIKEN 数据库的 2455 个细胞系 STR 数据。如果待检测细胞未收录于以上细胞库或这是自行建立的新细胞系将无法进行比对，用户需根据细胞分型结果自行与其他数据库进行比对。

## (三) 文献引用参考

1. Authentication testing of HEK 293T and HeLa cell lines have been performed by Shanghai Biowing Applied Biotechnology Co.,Ltd via STR profiling. STR profiles match the standards recommended for HEK 293T and HeLa cell lines authentication
2. AGS, NCI-N87, HGC-27 and HEK293 were STR-authenticated on Dec. 8, 2015 by Shanghai Biowing Applied Biotechnology Co. LTD, Shanghai, China

**主要实验人员：**张佳男

**复核人：**龚礼瑾

**负责人：**陈轶群

**签发日期：**2022 年 06 月 14 日
